# Supplementary material for: Computational Modeling of Lipid Metabolism in Yeast
Source: PubMed Central journal article supplement (PMC5037213; doi:10.3389/fmolb.2016.00057), 2016-09-27

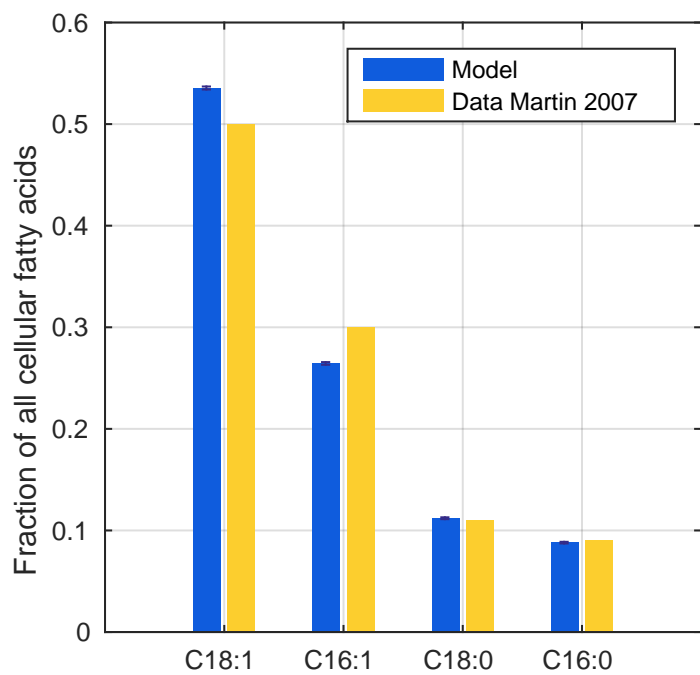

Supplement: Image2.pdf [file Image2.pdf]
